# Supplementary material for: Metabolite Changes Signal Genetic Regulatory Mechanisms for Robust Cell Behavior
Source: PubMed Central journal article supplement — mBio. 2014 Jan 28;5(1):e00972-13. doi: 10.1128/mBio.00972-13 (PMC3903281; doi:10.1128/mbio.00972-13), 2014-01-28
Supplement: mbo001141724so1.pdf [file mbo001141724so1.pdf]

Table S1. Significantly affected genes in the presence of D-galactose in *galT* cells grown in glycerol M63 minimal medium.

| Locus        | Gene        | MAT<br>(w/o<br>Gal) | MAT<br>(w/<br>Gal) | MAT<br>change* | Function                                                                                   |
|--------------|-------------|---------------------|--------------------|----------------|--------------------------------------------------------------------------------------------|
| Up regulated |             |                     |                    |                |                                                                                            |
| b0759        | <i>galE</i> | -0.18               | 6.66               | 6.84           | UDP-galactose-4-epimerase                                                                  |
| b4119        | <i>melA</i> | 0.80                | 7.24               | 6.44           | alpha-galactosidase NAD(P)-binding                                                         |
| b0757        | <i>galK</i> | 0.75                | 6.37               | 5.62           | galactokinase                                                                              |
| b3510        | <i>hdeA</i> | 5.56                | 9.87               | 4.31           | stress response protein acid-resistance protein                                            |
| b3509        | <i>hdeB</i> | 4.33                | 8.62               | 4.29           | acid-resistance protein                                                                    |
| b0756        | <i>galM</i> | 1.92                | 5.29               | 3.37           | galactose-1-epimerase (mutarotase)                                                         |
| b4120        | <i>melB</i> | 1.12                | 4.44               | 3.32           | melibiose:sodium symporter                                                                 |
| b1493        | <i>gadB</i> | 2.34                | 5.66               | 3.32           | glutamate decarboxylase B PLP-dependent                                                    |
| b1492        | <i>gadC</i> | 0.18                | 3.48               | 3.30           | predicted glutamate:gamma-aminobutyric acid antiporter                                     |
| b3517        | <i>gadA</i> | 2.36                | 5.44               | 3.08           | glutamate decarboxylase A PLP-dependent                                                    |
| b3511        | <i>hdeD</i> | 1.25                | 4.22               | 2.97           | acid-resistance membrane protein                                                           |
| b1480        | <i>sra</i>  | 6.82                | 9.74               | 2.92           | 30S ribosomal subunit protein S22                                                          |
| b0331        | <i>prpB</i> | 0.63                | 3.50               | 2.87           | 2-methylisocitrate lyase                                                                   |
| b0296        | <i>ykgM</i> | 2.49                | 5.35               | 2.86           | rpmE (L31) paralog                                                                         |
| b1836        | <i>yebV</i> | 3.79                | 6.57               | 2.78           | predicted protein                                                                          |
| b4506        | <i>ykgO</i> | 0.73                | 3.49               | 2.76           | rpmJ (L36) paralog                                                                         |
| b0953        | <i>rmf</i>  | 5.63                | 8.38               | 2.75           | ribosome modulation factor                                                                 |
| b2943        | <i>galP</i> | 0.53                | 3.08               | 2.55           | D-galactose transporter                                                                    |
| b2080        | <i>yegP</i> | 1.56                | 3.98               | 2.42           | predicted protein                                                                          |
| b1783        | <i>yeaG</i> | 0.69                | 3.10               | 2.41           | conserved protein with nucleoside triphosphate hydrolase domain                            |
| b1283        | <i>osmB</i> | 0.00                | 2.34               | 2.34           | lipoprotein                                                                                |
| b1897        | <i>otsB</i> | -0.37               | 1.94               | 2.31           | trehalose-6-phosphate phosphatase biosynthetic                                             |
| b1661        | <i>cfa</i>  | 1.74                | 4.03               | 2.29           | cyclopropane fatty acyl phospholipid synthase (unsaturated-phospholipid methyltransferase) |
| b1051        | <i>msyB</i> | 2.76                | 5.04               | 2.28           | predicted protein                                                                          |
| b0333        | <i>prpC</i> | 0.82                | 3.09               | 2.27           | 2-methylcitrate synthase                                                                   |
| b4376        | <i>osmY</i> | 1.41                | 3.66               | 2.25           | periplasmic protein                                                                        |
| b2097        | <i>fbaB</i> | 3.20                | 5.42               | 2.22           | fructose-bisphosphate aldolase class I                                                     |
| b0334        | <i>prpD</i> | -0.33               | 1.87               | 2.20           | 2-methylcitrate dehydratase                                                                |
| b1004        | <i>wrbA</i> | 3.38                | 5.55               | 2.17           | predicted flavoprotein in Trp regulation                                                   |
| b1482        | <i>osmC</i> | 1.29                | 3.45               | 2.16           | osmotically inducible stress-inducible membrane protein                                    |
| b1732        | <i>katE</i> | 1.25                | 3.38               | 2.13           | hydroperoxidase HP11(III) (catalase)                                                       |
| b2464        | <i>talA</i> | 1.84                | 3.98               | 2.14           | transaldolase A                                                                            |
| b0897        | <i>ycaC</i> | 1.39                | 3.49               | 2.10           | predicted hydrolase                                                                        |
| b2266        | <i>elaB</i> | 2.17                | 4.21               | 2.04           | conserved protein                                                                          |
| b3555        | <i>yiaG</i> | 1.29                | 3.32               | 2.03           | predicted transcriptional regulator                                                        |
| b0836        | <i>yliH</i> | -1.25               | 0.70               | 1.95           | conserved protein                                                                          |
| b4227        | <i>ytfQ</i> | 1.32                | 3.27               | 1.95           | predicted sugar transporter subunit: periplasmic-binding component of ABC superfamily      |
| b1896        | <i>otsA</i> | 0.25                | 2.19               | 1.94           | trehalose-6-phosphate synthase                                                             |
| b1003        | <i>yccJ</i> | 0.31                | 2.21               | 1.90           | predicted protein                                                                          |
| b1795        | <i>yeaQ</i> | 1.29                | 3.09               | 1.80           | conserved inner membrane protein                                                           |
| b1724        | <i>ydiZ</i> | 1.35                | 3.13               | 1.78           | predicted protein                                                                          |
| b1259        | <i>yciG</i> | -0.21               | 1.54               | 1.75           | predicted protein                                                                          |

Down regulated

b0928 *aspC* 5.93 3.88 -2.05 aspartate aminotransferase PLP-dependent

|       |             |       |       |       |                                                                   |
|-------|-------------|-------|-------|-------|-------------------------------------------------------------------|
| b0211 | <i>mltD</i> | 2.26  | 0.21  | -2.05 | predicted membrane-bound lytic murein transglycosylase D          |
| b0023 | <i>rpsT</i> | 4.16  | 2.11  | -2.05 | 30S ribosomal subunit protein S20                                 |
| b3169 | <i>nusA</i> | 3.43  | 1.38  | -2.05 | transcription termination/antitermination L factor                |
| b3796 | <i>argX</i> | 1.77  | -0.29 | -2.06 | tRNA-Arg(CCG)                                                     |
| b1304 | <i>pspA</i> | 2.19  | 0.13  | -2.06 | regulatory protein for phage-shock-protein operon                 |
| b2007 | <i>yeeX</i> | 5.31  | 3.23  | -2.08 | conserved protein                                                 |
| b1717 | <i>rpmI</i> | 6.20  | 4.11  | -2.09 | 50S ribosomal subunit protein L35                                 |
| b0434 | <i>yajG</i> | 4.18  | 2.09  | -2.09 | predicted lipoprotein                                             |
| b0672 | <i>leuW</i> | 5.40  | 3.30  | -2.10 | tRNA-Leu(UAG)                                                     |
| b0150 | <i>fhuA</i> | 1.30  | -0.79 | -2.09 | ferrichrome outer membrane transporter                            |
| b0889 | <i>lrp</i>  | 4.78  | 2.68  | -2.10 | DNA-binding transcriptional dual regulator leucine-binding        |
| b0748 | <i>lysZ</i> | 7.18  | 5.08  | -2.10 | tRNA-Lys(UUU)                                                     |
| b3672 | <i>ivbL</i> | 6.51  | 4.40  | -2.11 | ilvB operon leader peptide                                        |
| b1207 | <i>prsA</i> | 4.19  | 2.08  | -2.11 | phosphoribosylpyrophosphate synthase                              |
| b0033 | <i>carB</i> | 2.36  | 0.24  | -2.12 | carbamoyl-phosphate synthase large subunit                        |
| b4142 | <i>groS</i> | 8.62  | 6.50  | -2.12 | Cpn10 chaperonin GroES small subunit of GroESL                    |
| b3261 | <i>fis</i>  | 3.49  | 1.36  | -2.13 | global DNA-binding transcriptional dual regulator                 |
| b2669 | <i>stpA</i> | 1.66  | -0.46 | -2.12 | DNA binding protein nucleoid-associated                           |
| b4172 | <i>hfq</i>  | 5.10  | 2.98  | -2.12 | HF-I host factor for RNA phage Q beta replication                 |
| b0177 | <i>ecfK</i> | 3.75  | 1.61  | -2.14 | conserved protein                                                 |
| b3170 | <i>yhbC</i> | 2.96  | 0.80  | -2.16 | conserved protein                                                 |
| b2480 | <i>bcp</i>  | 5.41  | 3.25  | -2.16 | thiol peroxidase thioredoxin-dependent                            |
| b3165 | <i>rpsO</i> | 4.22  | 2.04  | -2.18 | 30S ribosomal subunit protein S15                                 |
| b3609 | <i>secB</i> | 3.73  | 1.52  | -2.21 | protein export chaperone                                          |
| b2463 | <i>maeB</i> | 3.24  | 1.03  | -2.21 | malic enzyme                                                      |
| b0115 | <i>aceF</i> | 4.09  | 1.87  | -2.22 | pyruvate dehydrogenase dihydrolipoyl transacetylase component E2  |
| b3339 | <i>tufA</i> | 11.36 | 9.13  | -2.23 | protein chain elongation factor EF-Tu (duplicate of tufB)         |
| b4418 | <i>sraB</i> | 4.71  | 2.47  | -2.24 | small RNA                                                         |
| b0071 | <i>leuD</i> | 5.34  | 3.10  | -2.24 | 3-isopropylmalate isomerase subunit                               |
| b2323 | <i>fabB</i> | 7.88  | 5.64  | -2.24 | 3-oxoacyl-[acyl-carrier-protein] synthase I                       |
| b2185 | <i>rplY</i> | 6.13  | 3.89  | -2.24 | 50S ribosomal subunit protein L25                                 |
| b3164 | <i>pnp</i>  | 4.20  | 1.94  | -2.26 | polynucleotide phosphorylase/polyadenylase                        |
| b2608 | <i>rimM</i> | 8.13  | 5.85  | -2.28 | 16S rRNA processing protein                                       |
| b4203 | <i>rplI</i> | 2.36  | 0.07  | -2.29 | 50S ribosomal subunit protein L9                                  |
| b2752 | <i>cysD</i> | 3.91  | 1.61  | -2.30 | sulfate adenylyltransferase subunit 2                             |
| b1094 | <i>acpP</i> | 9.00  | 6.71  | -2.29 | acyl carrier protein (ACP)                                        |
| b3299 | <i>rpmJ</i> | 9.73  | 7.43  | -2.30 | 50S ribosomal subunit protein L36                                 |
| b1602 | <i>pntB</i> | 3.83  | 1.53  | -2.30 | pyridine nucleotide transhydrogenase beta subunit                 |
| b0170 | <i>tsf</i>  | 6.26  | 3.96  | -2.30 | protein chain elongation factor EF-Ts                             |
| b0746 | <i>valZ</i> | 8.74  | 6.43  | -2.31 | tRNA-Val(UAC)                                                     |
| b0721 | <i>sdhC</i> | 6.97  | 4.66  | -2.31 | succinate dehydrogenase membrane subunit binds cytochrome b556    |
| b2283 | <i>nuoG</i> | 3.60  | 1.28  | -2.32 | NADH:ubiquinone oxidoreductase chain G                            |
| b0565 | <i>ompT</i> | 10.27 | 7.94  | -2.33 | DLP12 prophage outer membrane protease VII                        |
| b2693 | <i>argY</i> | 5.55  | 3.23  | -2.32 | tRNA-Arg(ACG)                                                     |
| b0114 | <i>aceE</i> | 4.88  | 2.55  | -2.33 | pyruvate dehydrogenase decarboxylase component E1 thiamin-binding |
| b2093 | <i>gatB</i> | 9.15  | 6.79  | -2.36 | galactitol-specific enzyme IIB component of PTS                   |
| b3255 | <i>accB</i> | 5.04  | 2.69  | -2.35 | acetyl CoA carboxylase BCCP subunit                               |
| b1782 | <i>mipA</i> | 4.44  | 2.07  | -2.37 | scaffolding protein for murein synthesizing machinery             |
| b3065 | <i>rpsU</i> | 5.85  | 3.47  | -2.38 | 30S ribosomal subunit protein S21                                 |
| b0747 | <i>lysY</i> | 8.01  | 5.63  | -2.38 | tRNA-Lys(UUU)                                                     |
| b2403 | <i>valY</i> | 7.89  | 5.50  | -2.39 | tRNA-Val(UAC)                                                     |
| b0474 | <i>adk</i>  | 5.08  | 2.69  | -2.39 | adenylate kinase                                                  |
| b4036 | <i>lamB</i> | 3.27  | 0.87  | -2.40 | maltose outer membrane porin (maltoporin)                         |
| b2285 | <i>nuoE</i> | 5.52  | 3.12  | -2.40 | NADH:ubiquinone oxidoreductase chain E                            |
| b3936 | <i>rpmE</i> | 5.28  | 2.86  | -2.42 | 50S ribosomal subunit protein L31                                 |
| b3341 | <i>rpsG</i> | 9.94  | 7.52  | -2.42 | 30S ribosomal subunit protein S7                                  |

|       |              |       |       |       |                                                                 |
|-------|--------------|-------|-------|-------|-----------------------------------------------------------------|
| b3707 | <i>tnaC</i>  | 3.38  | 0.95  | -2.43 | tryptophanase leader peptide                                    |
| b2935 | <i>tktA</i>  | 4.37  | 1.94  | -2.43 | transketolase 1 thiamin-binding                                 |
| b2607 | <i>trmD</i>  | 7.99  | 5.55  | -2.44 | tRNA (guanine-1-)-methyltransferase                             |
| b0178 | <i>hlpA</i>  | 5.66  | 3.22  | -2.44 | periplasmic chaperone                                           |
| b2402 | <i>valX</i>  | 2.56  | 0.11  | -2.45 | tRNA-Val(UAC)                                                   |
| b1093 | <i>b1093</i> | 5.22  | 2.75  | -2.47 | 3-oxoacyl-[acyl-carrier-protein] reductase                      |
| b2284 | <i>nuoF</i>  | 4.04  | 1.57  | -2.47 | NADH:ubiquinone oxidoreductase chain F                          |
| b3260 | <i>dusB</i>  | 2.97  | 0.49  | -2.48 | tRNA-dihydrouridine synthase B                                  |
| b3460 | <i>livJ</i>  | 8.59  | 6.10  | -2.49 | leucine/isoleucine/valine transporter subunit                   |
| b1761 | <i>gdhA</i>  | 4.62  | 2.12  | -2.50 | glutamate dehydrogenase NADP-specific                           |
| b0337 | <i>codA</i>  | 2.92  | 0.42  | -2.50 | cytosine deaminase                                              |
| b2599 | <i>pheA</i>  | 6.05  | 3.53  | -2.52 | chorismate mutase; prephenate dehydratase                       |
| b4034 | <i>malE</i>  | 3.54  | 1.00  | -2.54 | maltose transporter subunit                                     |
| b3976 | <i>thrU</i>  | 6.41  | 3.85  | -2.56 | tRNA-Thr(UGU)                                                   |
| b3766 | <i>ilvL</i>  | 5.65  | 3.08  | -2.57 | ilvG operon leader peptide                                      |
| b3739 | <i>atpI</i>  | 4.31  | 1.73  | -2.58 | ATP synthase membrane-bound accessory subunit                   |
| b3980 | <i>tufB</i>  | 11.31 | 8.72  | -2.59 | protein chain elongation factor EF-Tu (duplicate of tufA)       |
| b1713 | <i>pheT</i>  | 4.89  | 2.30  | -2.59 | phenylalanine tRNA synthetase beta subunit                      |
| b3433 | <i>asd</i>   | 4.76  | 2.14  | -2.62 | aspartate-semialdehyde dehydrogenase NAD(P)-binding             |
| b1237 | <i>hns</i>   | 6.84  | 4.21  | -2.63 | global DNA-binding transcriptional dual regulator H-NS          |
| b4000 | <i>hupA</i>  | 8.39  | 5.76  | -2.63 | HU DNA-binding transcriptional regulator alpha subunit          |
| b3230 | <i>rpsI</i>  | 6.00  | 3.37  | -2.63 | 30S ribosomal subunit protein S9                                |
| b1089 | <i>rpmF</i>  | 4.16  | 1.52  | -2.64 | 50S ribosomal subunit protein L32                               |
| b3321 | <i>rpsJ</i>  | 9.80  | 7.15  | -2.65 | 30S ribosomal subunit protein S10                               |
| b1452 | <i>yncE</i>  | 3.47  | 0.82  | -2.65 | conserved protein                                               |
| b2609 | <i>rpsP</i>  | 7.58  | 4.94  | -2.64 | 30S ribosomal subunit protein S16                               |
| b4414 | <i>tff</i>   | 6.59  | 3.94  | -2.65 | small RNA                                                       |
| b3308 | <i>rpIE</i>  | 9.96  | 7.32  | -2.64 | 50S ribosomal subunit protein L5                                |
| b2288 | <i>nuoA</i>  | 5.34  | 2.69  | -2.65 | NADH:ubiquinone oxidoreductase membrane subunit A               |
| b3294 | <i>rpIQ</i>  | 5.94  | 3.28  | -2.66 | 50S ribosomal subunit protein L17                               |
| b3636 | <i>rpmG</i>  | 8.03  | 5.35  | -2.68 | 50S ribosomal subunit protein L33                               |
| b2286 | <i>nuoC</i>  | 4.57  | 1.89  | -2.68 | NADH:ubiquinone oxidoreductase chain CD                         |
| b0407 | <i>yajC</i>  | 4.85  | 2.14  | -2.71 | SecYEG protein translocase auxiliary subunit                    |
| b3310 | <i>rpIN</i>  | 9.80  | 7.08  | -2.72 | 50S ribosomal subunit protein L14                               |
| b3296 | <i>rpsD</i>  | 9.69  | 6.95  | -2.74 | 30S ribosomal subunit protein S4                                |
| b2287 | <i>nuoB</i>  | 5.26  | 2.51  | -2.75 | NADH:ubiquinone oxidoreductase chain B                          |
| b3342 | <i>rpsL</i>  | 9.40  | 6.65  | -2.75 | 30S ribosomal subunit protein S12                               |
| b3670 | <i>ilvN</i>  | 2.34  | -0.42 | -2.76 | acetolactate synthase I small subunit                           |
| b2243 | <i>glpC</i>  | 2.44  | -0.33 | -2.77 | sn-glycerol-3-phosphate dehydrogenase (anaerobic) small subunit |
| b0763 | <i>modA</i>  | 6.36  | 3.59  | -2.77 | molybdate transporter subunit                                   |
| b2414 | <i>cysK</i>  | 8.45  | 5.68  | -2.77 | cysteine synthase A O-acetylserine sulfhydrylase A subunit      |
| b3403 | <i>pck</i>   | 5.68  | 2.90  | -2.78 | phosphoenolpyruvate carboxykinase                               |
| b3340 | <i>fusA</i>  | 9.91  | 7.13  | -2.78 | protein chain elongation factor EF-G GTP-binding                |
| b4314 | <i>b4314</i> | 5.15  | 2.35  | -2.80 | major type 1 subunit fimbrin (pilin)                            |
| b3986 | <i>rpIL</i>  | 7.69  | 4.86  | -2.83 | 50S ribosomal subunit protein L7/L12                            |
| b0741 | <i>pal</i>   | 6.38  | 3.53  | -2.85 | peptidoglycan-associated outer membrane lipoprotein             |
| b0811 | <i>glnH</i>  | 6.72  | 3.85  | -2.87 | glutamine transporter subunit                                   |
| b3295 | <i>rpoA</i>  | 9.04  | 6.17  | -2.87 | RNA polymerase alpha subunit                                    |
| b3870 | <i>glnA</i>  | 4.42  | 1.54  | -2.88 | glutamine synthetase                                            |
| b1714 | <i>pheS</i>  | 4.96  | 2.08  | -2.88 | phenylalanine tRNA synthetase alpha subunit                     |
| b3311 | <i>rpsQ</i>  | 7.01  | 4.12  | -2.89 | 30S ribosomal subunit protein S17                               |
| b3301 | <i>rpIO</i>  | 8.12  | 5.23  | -2.89 | 50S ribosomal subunit protein L15                               |
| b1243 | <i>oppA</i>  | 5.39  | 2.49  | -2.90 | oligopeptide transporter subunit                                |
| b0004 | <i>thrC</i>  | 3.85  | 0.93  | -2.92 | threonine synthase                                              |
| b0074 | <i>leuA</i>  | 6.18  | 3.26  | -2.92 | 2-isopropylmalate synthase                                      |
| b4246 | <i>pyrL</i>  | 4.17  | 1.24  | -2.93 | pyrBI operon leader peptide                                     |
| b3300 | <i>secY</i>  | 8.32  | 5.38  | -2.94 | preprotein translocase membrane subunit                         |
| b3309 | <i>rplX</i>  | 9.74  | 6.79  | -2.95 | 50S ribosomal subunit protein L24                               |

|       |               |       |       |       |                                                                    |
|-------|---------------|-------|-------|-------|--------------------------------------------------------------------|
| b0911 | <i>rpsA</i>   | 8.17  | 5.18  | -2.99 | 30S ribosomal subunit protein S1                                   |
| b3767 | <i>ilvG_1</i> | 3.86  | 0.85  | -3.01 | acetolactate synthase II large subunit N-ter fragment (pseudogene) |
| b0072 | <i>leuC</i>   | 5.87  | 2.86  | -3.01 | 3-isopropylmalate isomerase subunit dehydratase component          |
| b3985 | <i>rplJ</i>   | 8.55  | 5.53  | -3.02 | 50S ribosomal subunit protein L10                                  |
| b3983 | <i>rplK</i>   | 9.22  | 6.19  | -3.03 | 50S ribosomal subunit protein L11                                  |
| b3320 | <i>rplC</i>   | 9.07  | 6.05  | -3.02 | 50S ribosomal subunit protein L3                                   |
| b3303 | <i>rpsE</i>   | 8.03  | 5.00  | -3.03 | 30S ribosomal subunit protein S5                                   |
| b3297 | <i>rpsK</i>   | 9.35  | 6.30  | -3.05 | 30S ribosomal subunit protein S11                                  |
| b3307 | <i>rpsN</i>   | 8.61  | 5.55  | -3.06 | 30S ribosomal subunit protein S14                                  |
| b3458 | <i>livK</i>   | 3.90  | 0.80  | -3.10 | leucine transporter subunit                                        |
| b1779 | <i>gapA</i>   | 9.27  | 6.15  | -3.12 | glyceraldehyde-3-phosphate dehydrogenase A                         |
| b3306 | <i>rpsH</i>   | 8.48  | 5.34  | -3.14 | 30S ribosomal subunit protein S8                                   |
| b0440 | <i>hupB</i>   | 5.81  | 2.64  | -3.17 | HU DNA-binding transcriptional regulator beta subunit              |
| b3231 | <i>rplM</i>   | 8.95  | 5.77  | -3.18 | 50S ribosomal subunit protein L13                                  |
| b0003 | <i>thrB</i>   | 3.62  | 0.42  | -3.20 | homoserine kinase                                                  |
| b3637 | <i>rpmB</i>   | 8.71  | 5.51  | -3.20 | 50S ribosomal subunit protein L28                                  |
| b0429 | <i>cyoD</i>   | 5.32  | 2.11  | -3.21 | cytochrome o ubiquinol oxidase subunit IV                          |
| b0436 | <i>tig</i>    | 4.98  | 1.73  | -3.25 | peptidyl-prolyl cis/trans isomerase (trigger factor)               |
| b3984 | <i>rplA</i>   | 8.20  | 4.95  | -3.25 | 50S ribosomal subunit protein L1                                   |
| b0169 | <i>rpsB</i>   | 7.62  | 4.37  | -3.25 | 30S ribosomal subunit protein S2                                   |
| b3298 | <i>rpsM</i>   | 9.21  | 5.95  | -3.26 | 30S ribosomal subunit protein S13                                  |
| b3316 | <i>rpsS</i>   | 8.08  | 4.79  | -3.29 | 30S ribosomal subunit protein S19                                  |
| b3313 | <i>rplP</i>   | 7.53  | 4.23  | -3.30 | 50S ribosomal subunit protein L16                                  |
| b0430 | <i>cyoC</i>   | 4.48  | 1.17  | -3.31 | cytochrome o ubiquinol oxidase subunit III                         |
| b3305 | <i>rplF</i>   | 8.04  | 4.72  | -3.32 | 50S ribosomal subunit protein L6                                   |
| b2241 | <i>glpA</i>   | 1.87  | -1.46 | -3.33 | sn-glycerol-3-phosphate dehydrogenase large subunit                |
| b2242 | <i>glpB</i>   | 2.47  | -0.86 | -3.33 | sn-glycerol-3-phosphate dehydrogenase membrane anchor subunit      |
| b3314 | <i>rpsC</i>   | 7.47  | 4.13  | -3.34 | 30S ribosomal subunit protein S3                                   |
| b3302 | <i>rpmD</i>   | 7.65  | 4.31  | -3.34 | 50S ribosomal subunit protein L30                                  |
| b0598 | <i>cstA</i>   | 5.35  | 1.93  | -3.42 | carbon starvation protein                                          |
| b0032 | <i>carA</i>   | 4.19  | 0.74  | -3.45 | carbamoyl phosphate synthetase small subunit                       |
| b3312 | <i>rpmC</i>   | 5.48  | 2.02  | -3.46 | 50S ribosomal subunit protein L29                                  |
| b4243 | <i>yjgF</i>   | 5.64  | 2.18  | -3.46 | ketoacid-binding protein                                           |
| b3304 | <i>rplR</i>   | 7.24  | 3.76  | -3.48 | 50S ribosomal subunit protein L18                                  |
| b3318 | <i>rplW</i>   | 9.12  | 5.64  | -3.48 | 50S ribosomal subunit protein L23                                  |
| b0073 | <i>leuB</i>   | 6.18  | 2.68  | -3.50 | 3-isopropylmalate dehydrogenase                                    |
| b0929 | <i>ompF</i>   | 12.38 | 8.87  | -3.51 | outer membrane porin 1a (labF)                                     |
| b3317 | <i>rplB</i>   | 7.97  | 4.46  | -3.51 | 50S ribosomal subunit protein L2                                   |
| b3671 | <i>ilvB</i>   | 4.00  | 0.44  | -3.56 | acetolactate synthase I large subunit                              |
| b1088 | <i>yceD</i>   | 7.77  | 4.18  | -3.59 | conserved protein                                                  |
| b3315 | <i>rplV</i>   | 8.13  | 4.51  | -3.62 | 50S ribosomal subunit protein L22                                  |
| b2518 | <i>ndk</i>    | 5.83  | 2.18  | -3.65 | multifunctional nucleoside diphosphate kinase                      |
| b3732 | <i>atpD</i>   | 5.71  | 2.03  | -3.68 | F1 sector of membrane-bound ATP synthase beta subunit              |
| b2175 | <i>spr</i>    | 6.17  | 2.48  | -3.69 | predicted peptidase outer membrane lipoprotein                     |
| b3319 | <i>rplD</i>   | 8.14  | 4.37  | -3.77 | 50S ribosomal subunit protein L4                                   |
| b1603 | <i>pntA</i>   | 5.88  | 2.09  | -3.79 | pyridine nucleotide transhydrogenase alpha subunit                 |
| b4202 | <i>rpsR</i>   | 6.77  | 2.95  | -3.82 | 30S ribosomal subunit protein S18                                  |
| b0431 | <i>cyoB</i>   | 5.38  | 1.52  | -3.86 | cytochrome o ubiquinol oxidase subunit I                           |
| b3977 | <i>tyrU</i>   | 7.76  | 3.89  | -3.87 | tRNA-Tyr(GUA)                                                      |
| b3738 | <i>atpB</i>   | 7.45  | 3.52  | -3.93 | F0 sector of membrane-bound ATP synthase subunit a                 |
| b4201 | <i>priB</i>   | 8.05  | 4.10  | -3.95 | primosomal protein N                                               |
| b0002 | <i>thrA</i>   | 5.23  | 1.27  | -3.96 | fused aspartokinase I and homoserine dehydrogenase I               |
| b4200 | <i>rpsF</i>   | 7.34  | 3.35  | -3.99 | 30S ribosomal subunit protein S6                                   |
| b2498 | <i>upp</i>    | 4.45  | 0.43  | -4.02 | uracil phosphoribosyltransferase                                   |
| b3979 | <i>thrT</i>   | 7.68  | 3.40  | -4.28 | tRNA-Thr(GGU)                                                      |
| b3737 | <i>atpE</i>   | 8.68  | 4.40  | -4.28 | F0 sector of membrane-bound ATP synthase subunit c                 |
| b3733 | <i>atpG</i>   | 6.70  | 2.29  | -4.41 | F1 sector of membrane-bound ATP synthase gamma subunit             |

|       |             |      |       |       |                                                                  |
|-------|-------------|------|-------|-------|------------------------------------------------------------------|
| b3544 | <i>dppA</i> | 7.73 | 3.27  | -4.46 | dipeptide transporter                                            |
| b3978 | <i>glyT</i> | 7.31 | 2.73  | -4.58 | tRNA-Gly(UCC)                                                    |
| b0432 | <i>cyoA</i> | 6.19 | 1.60  | -4.59 | cytochrome o ubiquinol oxidase subunit II                        |
| b3736 | <i>atpF</i> | 8.28 | 3.66  | -4.62 | F0 sector of membrane-bound ATP synthase subunit b               |
| b0553 | <i>nmpC</i> | 9.43 | 4.76  | -4.67 | DLP12 prophage truncated outer membrane porin (pseudogene)       |
| b3734 | <i>atpA</i> | 7.46 | 2.74  | -4.72 | F1 sector of membrane-bound ATP synthase alpha subunit           |
| b3735 | <i>atpH</i> | 8.47 | 3.73  | -4.74 | F1 sector of membrane-bound ATP synthase delta subunit           |
| b3774 | <i>ilvC</i> | 8.12 | 3.14  | -4.98 | ketol-acid reductoisomerase NAD(P)-binding                       |
| b2239 | <i>glpQ</i> | 4.67 | -1.14 | -5.81 | periplasmic glycerophosphodiester phosphodiesterase              |
| b4244 | <i>pyrI</i> | 7.19 | 0.94  | -6.25 | aspartate carbamoyltransferase regulatory subunit                |
| b2240 | <i>glpT</i> | 6.13 | -0.40 | -6.53 | sn-glycerol-3-phosphate transporter                              |
| b3426 | <i>glpD</i> | 6.79 | 0.20  | -6.59 | sn-glycerol-3-phosphate dehydrogenase aerobic FAD/NAD(P)-binding |
| b4245 | <i>pyrB</i> | 7.88 | 1.18  | -6.70 | aspartate carbamoyltransferase catalytic subunit                 |
| b3927 | <i>glpF</i> | 8.81 | 0.19  | -8.62 | glycerol facilitator                                             |
| b3926 | <i>glpK</i> | 9.60 | 0.72  | -8.88 | glycerol kinase                                                  |

\* Genes with two times standard deviations of MAT score changes (natural log) were selected from DNA tiling arrays.
