# Supplementary material for: Metabolite Changes Signal Genetic Regulatory Mechanisms for Robust Cell Behavior
Source: PubMed Central journal article supplement — mBio. 2014 Jan 28;5(1):e00972-13. doi: 10.1128/mBio.00972-13 (PMC3903281; doi:10.1128/mbio.00972-13), 2014-01-28
Supplement: mbo001141724so2.pdf [file mbo001141724so2.pdf]

Table S2. Metabolomic profile of galactose-stressed *galT* strain

| BIOCHEMICAL NAME                                          | Mean values of raw ion counts* |            | Natural Log of (Mean values) |        | Fold of change (+) Gal/ (-) Gal** | Statistical values*** |         | PLATFORM  | KEGG   | RI     | MASS  |
|-----------------------------------------------------------|--------------------------------|------------|------------------------------|--------|-----------------------------------|-----------------------|---------|-----------|--------|--------|-------|
|                                                           | w/o Gal                        | w/ Gal     | w/o Gal                      | w/ Gal |                                   | P-VALUE               | Q-VALUE |           |        |        |       |
| galactose                                                 | 177463.13                      | #####      | 12.09                        | 19.03  | 6.94                              | < 0.001               | 0.0014  | GC/MS     | C01662 | 1793.8 | 203.9 |
| glucose                                                   | 514464.67                      | 7593415.31 | 13.15                        | 15.84  | 2.69                              | 0.0124                | 0.0134  | GC/MS     | C00293 | 1866.8 | 217.1 |
| 1-oleoylglycerophosphocholine                             | 58639.25                       | 270266.51  | 10.98                        | 12.51  | 1.53                              | 0.0331                | 0.0254  | LC/MS pos | C03916 | 5700   | 522.4 |
| maltotriose                                               | 278502.33                      | 1216741.60 | 12.54                        | 14.01  | 1.47                              | 0.0760                | 0.0444  | GC/MS     | C01835 | 2419   | 204   |
| mannose                                                   | 463390.33                      | 1790104.91 | 13.05                        | 14.40  | 1.35                              | 0.0292                | 0.0234  | GC/MS     | C00159 | 1753.5 | 203.9 |
| Isobar: fructose 1,6-diphosphate, glucose 1,6-diphosphate | 9015.70                        | 34385.94   | 9.11                         | 10.45  | 1.34                              | 0.0109                | 0.0125  | LC/MS neg | -      | 572    | 339   |
| fructose-6-phosphate                                      | 40600.33                       | 137862.47  | 10.61                        | 11.83  | 1.22                              | 0.0057                | 0.0091  | GC/MS     | C05345 | 1994.9 | 315.1 |
| asparagine                                                | 73941.33                       | 227441.14  | 11.21                        | 12.33  | 1.12                              | 0.0064                | 0.0094  | GC/MS     | C00152 | 1651.2 | 231   |
| riboflavin (Vitamin B2)                                   | 133309.86                      | 381043.01  | 11.80                        | 12.85  | 1.05                              | < 0.001               | 0.0014  | LC/MS pos | C00255 | 3111   | 377.2 |
| ribose                                                    | 2563519.97                     | 7179721.10 | 14.76                        | 15.79  | 1.03                              | < 0.001               | 0.0007  | GC/MS     | C00121 | 1650.2 | 204   |
| nicotinate ribonucleoside                                 | 76041.37                       | 203534.02  | 11.24                        | 12.22  | 0.98                              | 0.0149                | 0.0154  | LC/MS pos | C05841 | 1105   | 256   |
| maltose                                                   | 1373745.58                     | 2964171.92 | 14.13                        | 14.90  | 0.77                              | 0.0246                | 0.0226  | GC/MS     | C00208 | 2142.1 | 204.1 |
| 10-heptadecenoate (17:1n7)                                | 828288.78                      | 1680629.20 | 13.63                        | 14.33  | 0.71                              | 0.0933                | 0.0499  | LC/MS neg | -      | 5558   | 267.3 |
| cis-vaccenate (18:1n7)                                    | 4946880.93                     | 9866664.52 | 15.41                        | 16.10  | 0.69                              | 0.0282                | 0.0234  | LC/MS neg | C08367 | 5648   | 281.4 |
| nicotinate                                                | 192799.19                      | 357653.76  | 12.17                        | 12.79  | 0.62                              | 0.0150                | 0.0154  | LC/MS neg | C00253 | 1221   | 122.1 |
| phosphopantetheine                                        | 154988.95                      | 250263.93  | 11.95                        | 12.43  | 0.48                              | 0.0753                | 0.0444  | LC/MS pos | C01134 | 2323   | 359.1 |
| nicotinic acid mononucleotide (NaMN)                      | 749239.39                      | 1158891.16 | 13.53                        | 13.96  | 0.44                              | 0.0188                | 0.0188  | LC/MS pos | -      | 879    | 336   |
| galactose 1-phosphate                                     | 89173.00                       | 134987.33  | 11.40                        | 11.81  | 0.41                              | 0.0627                | 0.0398  | GC/MS     | -      | 1998   | 299.1 |
| 10-nonadecenoate (19:1n9)                                 | 189002.61                      | 282685.00  | 12.15                        | 12.55  | 0.40                              | 0.0257                | 0.0226  | LC/MS neg | -      | 5775   | 295.4 |
| mannitol-1-phosphate                                      | 979427.63                      | 1415534.44 | 13.79                        | 14.16  | 0.37                              | 0.0559                | 0.0375  | GC/MS     | -      | 2035   | 387.2 |
| eicosenoate (20:1n9 or 11)                                | 78785.14                       | 112092.09  | 11.27                        | 11.63  | 0.35                              | 0.0947                | 0.0499  | LC/MS neg | -      | 5955   | 309.4 |
| ethanolamine                                              | 598512.90                      | 764890.96  | 13.30                        | 13.55  | 0.25                              | 0.0932                | 0.0499  | GC/MS     | C00189 | 1304   | 174.1 |
| arginine                                                  | 352873.99                      | 445908.68  | 12.77                        | 13.01  | 0.23                              | 0.0771                | 0.0444  | GC/MS     | C00062 | 1608.5 | 142   |
| thymine                                                   | 844168.14                      | 1054175.19 | 13.65                        | 13.87  | 0.22                              | 0.0116                | 0.0130  | GC/MS     | C00178 | 1429.1 | 255   |
| hypoxanthine                                              | 448030.06                      | 518055.71  | 13.01                        | 13.16  | 0.15                              | 0.0046                | 0.0078  | LC/MS neg | C00262 | 1313   | 135.1 |
| fructose                                                  | #####                          | #####      | 16.14                        | 16.28  | 0.14                              | 0.0916                | 0.0499  | GC/MS     | C00095 | 1758   | 217   |
| myristate (14:0)                                          | 227377.20                      | 186617.49  | 12.33                        | 12.14  | -0.20                             | 0.0798                | 0.0453  | GC/MS     | C06424 | 1789.7 | 285.2 |
| malate                                                    | 1504774.05                     | 1227503.67 | 14.22                        | 14.02  | -0.20                             | 0.0489                | 0.0347  | GC/MS     | C00149 | 1502   | 233   |
| thymidine 5'-monophosphate                                | 31715.98                       | 25862.67   | 10.36                        | 10.16  | -0.20                             | 0.0736                | 0.0444  | LC/MS neg | C00364 | 924    | 321.1 |
| N-acetylisoleucine                                        | 434430.88                      | 348534.76  | 12.98                        | 12.76  | -0.22                             | 0.0699                | 0.0429  | LC/MS pos | -      | 3370   | 174.1 |
| xanthine                                                  | 3578253.26                     | 2769563.60 | 15.09                        | 14.83  | -0.26                             | 0.0900                | 0.0499  | GC/MS     | C00385 | 1889.9 | 353   |
| tyrosine                                                  | #####                          | 8636362.37 | 16.23                        | 15.97  | -0.26                             | 0.0503                | 0.0350  | LC/MS pos | C00082 | 1516   | 182.1 |
| glycerol 3-phosphate (G3P)                                | 3979996.81                     | 2975739.46 | 15.20                        | 14.91  | -0.29                             | 0.0583                | 0.0384  | GC/MS     | C00093 | 1719.7 | 357.1 |
| histidine                                                 | 1857307.54                     | 1364748.14 | 14.43                        | 14.13  | -0.31                             | 0.0310                | 0.0243  | GC/MS     | C00135 | 1837.3 | 154   |
| glycine                                                   | #####                          | #####      | 17.01                        | 16.69  | -0.31                             | 0.0091                | 0.0112  | GC/MS     | C00037 | 1166   | 101.9 |
| pseudouridine                                             | 233302.96                      | 168966.67  | 12.36                        | 12.04  | -0.32                             | < 0.001               | 0.0007  | LC/MS neg | C02067 | 1104   | 243.1 |
| 4-hydroxybutyrate (GHB)                                   | 247460.87                      | 178327.64  | 12.42                        | 12.09  | -0.33                             | 0.0459                | 0.0339  | GC/MS     | C00989 | 1277   | 233.1 |
| adenosine                                                 | 967332.15                      | 689501.79  | 13.78                        | 13.44  | -0.34                             | 0.0677                | 0.0423  | LC/MS pos | C00212 | 1605   | 268.1 |
| 2-aminobutyrate                                           | 3099893.65                     | 2203997.05 | 14.95                        | 14.61  | -0.34                             | 0.0014                | 0.0040  | GC/MS     | C02261 | 1215.7 | 130   |
| pantothenate                                              | 4082630.38                     | 2890565.45 | 15.22                        | 14.88  | -0.35                             | 0.0623                | 0.0398  | LC/MS pos | C00864 | 2218   | 220.1 |
| threonine                                                 | 2863023.64                     | 1967133.85 | 14.87                        | 14.49  | -0.38                             | 0.0081                | 0.0109  | GC/MS     | C00188 | 1412.3 | 218.1 |

|                                         |            |            |       |       |       |         |        |           |               |        |       |
|-----------------------------------------|------------|------------|-------|-------|-------|---------|--------|-----------|---------------|--------|-------|
| alanylalanine                           | 3474433.44 | 2272804.65 | 15.06 | 14.64 | -0.42 | 0.0532  | 0.0363 | LC/MS pos | C00993        | 757    | 161.1 |
| N-acetylmethionine                      | 21755.33   | 14016.40   | 9.99  | 9.55  | -0.44 | 0.0287  | 0.0234 | LC/MS neg | C02712        | 1805   | 190.1 |
| 3-hydroxybutyrate (BHBA)                | 995913.53  | 615786.19  | 13.81 | 13.33 | -0.48 | 0.0039  | 0.0076 | GC/MS     | C01089        | 1203.5 | 116.9 |
| acetyl CoA                              | 780682.19  | 438802.89  | 13.57 | 12.99 | -0.58 | 0.0219  | 0.0213 | LC/MS neg | C00024,C00040 | 1900   | 808.1 |
| N-acetylvaline                          | 269754.28  | 146549.98  | 12.51 | 11.90 | -0.61 | 0.0363  | 0.0273 | LC/MS pos |               | 2654   | 160.1 |
| adenosine 5'diphosphoribose             | 26008.62   | 14034.68   | 10.17 | 9.55  | -0.62 | 0.0472  | 0.0341 | LC/MS neg | C00301        | 964    | 558.1 |
| valine                                  | #####      | #####      | 17.38 | 16.76 | -0.62 | 0.0083  | 0.0109 | LC/MS pos | C00183        | 1040   | 118.1 |
| glutamine                               | 134185.22  | 70641.34   | 11.81 | 11.17 | -0.64 | 0.0292  | 0.0234 | GC/MS     | C00064        | 1698.4 | 227.1 |
| homoserine                              | 324218.04  | 170019.29  | 12.69 | 12.04 | -0.65 | 0.0045  | 0.0078 | GC/MS     | C00263,C00926 | 1471   | 218.1 |
| succinate                               | 7809463.60 | 3966625.09 | 15.87 | 15.19 | -0.68 | 0.0017  | 0.0044 | GC/MS     | C00042        | 1348   | 247   |
| nicotinate adenine dinucleotide (NAAD+) | 54427.98   | 26387.44   | 10.90 | 10.18 | -0.72 | 0.0011  | 0.0036 | LC/MS neg | C00857        | 1236   | 662.9 |
| lysine                                  | 1642510.65 | 789632.88  | 14.31 | 13.58 | -0.73 | 0.0255  | 0.0226 | GC/MS     | C00047        | 1836.7 | 317.2 |
| glutamate                               | #####      | 5311283.60 | 16.22 | 15.49 | -0.74 | 0.0226  | 0.0213 | LC/MS pos | C00025        | 681    | 148.1 |
| cysteine                                | 3378651.84 | 1488225.16 | 15.03 | 14.21 | -0.82 | 0.0974  | 0.0506 | GC/MS     | C00097        | 1560.1 | 218   |
| 5,6-dihydrouracil                       | 248323.43  | 107722.83  | 12.42 | 11.59 | -0.84 | 0.0021  | 0.0050 | GC/MS     | C00429        | 1505.2 | 243   |
| diaminopimelate                         | 284106.83  | 115045.47  | 12.56 | 11.65 | -0.90 | 0.0062  | 0.0094 | GC/MS     | C00666        | 1874.4 | 272.1 |
| ophthalmate                             | 2635527.80 | 831589.30  | 14.78 | 13.63 | -1.15 | 0.0035  | 0.0073 | LC/MS pos | -             | 1457   | 290.1 |
| glutathione, reduced (GSH)              | 5552947.39 | 1649573.61 | 15.53 | 14.32 | -1.21 | 0.0031  | 0.0068 | LC/MS pos | C00051        | 1274   | 308.1 |
| orotate                                 | #####      | 4128077.91 | 16.50 | 15.23 | -1.26 | 0.0019  | 0.0047 | GC/MS     | C00295        | 1709.6 | 254.1 |
| cysteine-glutathione disulfide          | 917595.35  | 247650.01  | 13.73 | 12.42 | -1.31 | 0.0041  | 0.0076 | LC/MS pos | -             | 821    | 427.1 |
| 2-pyrrolidinone                         | 895367.99  | 208445.73  | 13.70 | 12.25 | -1.46 | 0.0087  | 0.0110 | GC/MS     | -             | 1190.9 | 142   |
| N-acetylaspartate (NAA)                 | 238449.61  | 55403.07   | 12.38 | 10.92 | -1.46 | < 0.001 | 0.0007 | LC/MS neg | C01042        | 620    | 174.1 |
| 3-phosphoglycerate                      | 1314934.06 | 296250.00  | 14.09 | 12.60 | -1.49 | < 0.001 | 0.0018 | GC/MS     | C00597        | 1753.6 | 299   |
| gamma-glutamylglutamate                 | 149946.86  | 32046.87   | 11.92 | 10.37 | -1.54 | < 0.001 | 0.0029 | LC/MS pos | -             | 1036   | 277.1 |
| succinyl CoA                            | 1262993.85 | 221062.68  | 14.05 | 12.31 | -1.74 | 0.0078  | 0.0109 | LC/MS pos | C00091        | 2412   | 868   |
| 5-methylthioadenosine (MTA)             | 97985.96   | 16897.33   | 11.49 | 9.73  | -1.76 | < 0.001 | 0.0007 | LC/MS pos | C00170        | 2427   | 298.1 |
| gamma-aminobutyrate (GABA)              | #####      | 1372119.06 | 16.27 | 14.13 | -2.14 | 0.0013  | 0.0038 | LC/MS pos | C00334        | 682    | 104.1 |
| glutathione, oxidized (GSSG)            | 698120.48  | 69872.95   | 13.46 | 11.15 | -2.30 | 0.0108  | 0.0125 | LC/MS pos | C00127        | 1496   | 613.1 |
| N-carbamoylaspartate                    | 523776.54  | 20576.33   | 13.17 | 9.93  | -3.24 | < 0.001 | 0.0029 | GC/MS     | C00438        | 1749   | 257.1 |
| dihydroorotate                          | 1138591.27 | 38864.33   | 13.95 | 10.57 | -3.38 | < 0.001 | 0.0027 | GC/MS     | C00337        | 1730.4 | 257   |

\*Three independent experiments were performed and mean values of raw ion counts were calculated.

\*\*Data was sorted by ratio of metabolite which was calculated by [Ln (w/ Gal) - Ln (w/o Gal)].

\*\*\*Statistical Analysis: Missing values (if any) are assumed to be below the level of detection. Given the multiple comparisons inherent in analysis of metabolites, between-group relative differences are assessed using both Student's t-tests (p-value) and false discovery rate analysis (q-value). Pathways are assigned for each metabolite, also allowing examination of overrepresented pathways.
